# Supplementary material
Source: PubMed Central journal article supplement (PMC8754261)
Supplement: NIHMS1705820-supplement-2.pdf [file NIHMS1705820-supplement-2.pdf]

**Fig. S1. Monitoring of freezing behavior in CFD under different optogenetic and behavioral manipulations.**

**Related to Figure 1.**

(A) Contextual fear discrimination (CFD) task with optogenetic activation of the LC-DG projection. Animals received a shock in context A (red), but not in context B (yellow) for nine days (left). Pattern of laser stimulation (both contexts) and electrical foot shock (only in context A) during a CFD session (right). (B) Analysis of progressive days of training in CFD. Acute activation of LC-DG projection impairs behavioral pattern separation in mice expressing ChR2 in LC-DG projections (Th-Cre<sup>LC-DG</sup>::ChR2, n = 10; Context:  $F_{(1,18)} = 19.430$ ,  $p < 0.001$ ; Days:  $F_{(1,144)} = 10.940$ ,  $p < 0.001$ ; Days  $\times$  Context:  $F_{(8,144)} = 0.892$ ,  $p = 0.525$ ), but not in wild-type controls (ChR2(-), n = 10; ChR2(-): Context:  $F_{(1,18)} = 2.685$ ,  $p = 0.119$ ; Days:  $F_{(1,144)} = 14.568$ ,  $p < 0.001$ ; Days  $\times$  Context:  $F_{(8,144)} = 1.386$ ,  $p = 0.206$ ). (C) CFD task with optogenetic inhibition of the LC-DG projection. Animals received a shock in context A (red), but not in context B (yellow) for nine days (left). Pattern of laser stimulation and electrical foot shock (only in context A) during a CFD session (right). (D) Analysis of progressive days of training in CFD. Acute inhibition of LC-DG projection resulted in enhancement of behavioral pattern separation in mice expressing ArchT in LC-DG projections (Th-Cre<sup>LC-DG</sup>::ArchT, n = 8; Context:  $F_{(1,12)} = 5.743$ ,  $p = 0.034$ ; Days:  $F_{(8,96)} = 2.470$ ,  $p = 0.018$ ; Days  $\times$  Context:  $F_{(8,96)} = 2.085$ ,  $p = 0.045$ ), but not in wild-type controls (ArchT(-), n = 8; ArchT(-): Context:  $F_{(1,12)} = 0.681$ ,  $p = 0.423$ ; Days:  $F_{(8,112)} = 1.865$ ,  $p < 0.073$ ; Days  $\times$  Context:  $F_{(8,112)} = 1.251$ ,  $p = 0.276$ ). (E) CFD task with optogenetic stimulation. Animals received a shock in context A (red), but not in context B (yellow) for nine days (left). Pattern of laser stimulation and shock (only in context A) during CFD (right). (F) Schematic of experimental approach depicts infection of LC-NE cells using Th-Cre mouse line with fluorescent reporter virus. (G) Mice expressing the reporter (Th-Cre<sup>LC-DG</sup>::eYFP) were able to discriminate between the two contexts in a similar fashion to wild-type controls (Day 1: Group:  $F_{(1,15)} = 0.533$ ,  $p = 0.477$ ; Context:  $F_{(1,15)} = 5.75$ ,  $p = 0.0299$ ; Group  $\times$  Context:  $F_{(1,15)} = 1.34$ ,  $p = 0.266$ ; Day 9: Group:  $F_{(1,15)} = 2.26$ ,  $p = 0.154$ ; Context:  $F_{(1,15)} = 44.94$ ,  $p < 0.0001$ ; Group  $\times$  Context:  $F_{(1,15)} = 0.0292$ ,  $p = 0.867$ ). Both groups received optogenetic light during trial, shaded bar denotes successful stimulation of opsin. (H) Th-Cre<sup>LC-DG</sup>::ArchT mice were subjected to one-shock contextual fear conditioning before contextual fear discrimination task (right). Pattern of laser stimulation and electrical foot shock during a CFD session (right). (I) Th-Cre<sup>LC-DG</sup>::ArchT mice (n = 7) did not differ from ArchT(-) controls (n = 8) even with LC-DG optogenetic inhibition during both the acquisition and retrieval stage ( $t_{(14)} = 2.075$ ;  $p = 0.1737$ ). Both groups received optogenetic light during trial, shaded bar denotes successful stimulation of opsin. (J) CFD task with restraint stress administration replacing optogenetic activation. (K) Restraint stress did not affect shock reactivity (indirect measure of pain sensitivity; Group  $\times$  Days:  $F_{(3,18)} = 1.264$ ,  $p = 0.317$ ). (L) Acute restraint stress impairs performance in CFD (n = 7; Stress:  $F_{(1,12)} = 1.823$ ,  $p = 0.201$ ; Days:  $F_{(7,84)} = 3.169$ ,  $p = 0.005$ ; Days  $\times$  Context:  $F_{(7,84)} = 0.640$ ,  $p = 0.721$ ), while naïve animals successfully discriminated between the two contexts (n = 7; Naïve: Context:  $F_{(1,7.86)} = 2.790$ ,  $p = 0.134$ ; Days:  $F_{(7,87.88)} = 2.712$ ,  $p = 0.014$ ; Days  $\times$  Context:  $F_{(7,87.88)} = 4.449$ ,  $p < 0.001$ ). (M) Contextual fear discrimination (CFD) task with optogenetic activation of the LC-DG projection, with a dissimilar context C (green) replacing context B. Animals received a shock in context A (red), but not in context C, for three days (left). Pattern of laser stimulation (both contexts) and electrical foot shock (only in context A) during a CFD session (right). (N) Acute activation of LC-DG projection still impairs behavioral pattern separation in mice expressing ChR2 (Th-Cre<sup>LC-DG</sup>::ChR2, n = 5; Context:  $F_{(1,4)} = 3.32$ ,  $p < 0.142$ ; Days:  $F_{(2,8)} = 75.08$ ,  $p < 0.001$ ; Days  $\times$  Context:  $F_{(2,8)} = 0.905$ ,  $p = 0.442$ ), but not in wild-type controls (ChR2(-), n = 6; ChR2(-): Context:  $F_{(1,5)} = 68.1$ ,  $p < 0.001$ ; Days:  $F_{(2,10)} = 3.071$ ,  $p < 0.091$ ; Days  $\times$  Context:  $F_{(2,10)} = 2.433$ ,  $p = 0.137$ ). (O) Although both groups successfully discriminated on the first day of training, Th-Cre<sup>LC-DG</sup>::ChR2 mice failed to discriminate between contexts in later training sessions (Day 1: Group:  $F_{(1,9)} = 2.661$ ,  $p = 0.137$ ; Context:  $F_{(1,9)} = 12.79$ ,  $p = 0.006$ ; Group  $\times$  Context:  $F_{(1,9)} = 0.055$ ,  $p = 0.82$ ; Day 3: Group:  $F_{(1,9)} = 6.645$ ,  $p = 0.0298$ ; Context:  $F_{(1,9)} = 48.84$ ,  $p < 0.0001$ ; Group  $\times$

Context:  $F_{(1,9)} = 8.509$ ,  $p = 0.017$ ). Both groups received optogenetic light during trial, shaded bar denotes successful stimulation of opsin. **(P)** Contextual fear discrimination (CFD) task with optogenetic activation of the LC-DG projection, with a dissimilar context C (green) replacing context B, and alternating order of presentation of contexts during training. Animals received a shock in context A (red), but not in context C, for nine days (left). Pattern of laser stimulation (both contexts) and electrical foot shock (only in context A) during a CFD session (right). **(Q)** Acute activation of LC-DG projection impairs behavior in mice expressing ChR2 ( $n = 7$ ) but not in wild-type controls ( $n = 11$ ; Day 1: Group:  $F_{(1,16)} = 0.611$ ,  $p = 0.446$ ; Context:  $F_{(1,16)} = 0.363$ ,  $p = 0.555$ ; Group  $\times$  Context:  $F_{(1,16)} = 0.114$ ,  $p = 0.740$ ; Day 5: Group:  $F_{(1,16)} = 2.51$ ,  $p = 0.132$ ; Context:  $F_{(1,16)} = 9.80$ ,  $p = 0.0065$ ; Group  $\times$  Context:  $F_{(1,16)} = 5.62$ ,  $p = 0.0307$ ; Day 9: Group:  $F_{(1,16)} = 6.43$ ,  $p = 0.0221$ ; Context:  $F_{(1,16)} = 18.1$ ,  $p = 0.0006$ ; Group  $\times$  Context:  $F_{(1,16)} = 4.97$ ,  $p = 0.0406$ ). Both groups received optogenetic light during trial, shaded bar denotes successful stimulation of opsin. All data are mean  $\pm$  SEM. \* $p < 0.05$ , \*\* $p < 0.01$ , \*\*\* $p < 0.005$ .

**Fig. S2. Validation of injection and implant sites and unmodulated behavior. Related to Figures 1, 2, 3, 4**

(A) Reconstruction of approximate locations of fiber-optic implant tips for Th-Cre<sup>LC-DG</sup>::ChR2, Th-Cre<sup>LC-DG</sup>::ArchT, vGlut1-Cre<sup>DG</sup>::Opto- $\beta_2$  mice and vGAT-Cre<sup>DG</sup>::Opto- $\beta_2$  mice. (B) Distance traveled in center of open field assay by Th-Cre and wild-type control animals without any circuit manipulations ( $t_{(18)} = -0.5002$ ;  $p = 0.6230$ ). (C) Distance traveled in perimeter of open field assay by Th-Cre and wild-type control animals without any circuit manipulations ( $t_{(18)} = -0.6720$ ;  $p = 0.5101$ ). (D) Time spent in center of open field assay by Th-Cre and wild-type controls without any circuit manipulations ( $t_{(18)} = 0.2176$ ;  $p = 0.8301$ ). (E) Speed in center of open field assay by Th-Cre and wild-type control animals without any circuit manipulations ( $t_{(18)} = -1.3705$ ;  $p = 0.1874$ ). No significant differences in terms of motor control and behavior were detected between Th-Cre ( $n = 11$ ) and wild-type controls ( $n = 9$ ). All data are mean  $\pm$  SEM. *ns*.

**Fig. S3. Timeline of imaging technique and supplementary imaging analysis. Related to Figures 2, 3.**

(A) Schematic depicting procedural timeline for *in vivo* imaging of DG neuronal ensemble in contextual fear conditioning (CFD). Th-Cre mice and wild-type controls were injected with HM3Dq in LC to enable increased modulation of LC-NE cells chemogenetically (Th-Cre<sup>LC-DG::</sup>HM3Dq), and Ca<sup>2+</sup> indicator (GCaMP6f) in the DG to enable imaging of the neural ensemble. Microendoscopic GRIN lenses were implanted above the DG in the same mice 2 weeks post-injection. 2 weeks post-implant, mice were trained in CFD. Following 10 days of training, mice were sacrificed for immunohistochemistry. (B) Schematic depicts placement of GCaMP6f injection and GRIN lens implant, as well as mini-microscope used during imaging. (C) Schematic of experimental approach depicts infection of LC-NE cells using Th-Cre mouse line with HM3Dq. (D) CFD with saline or CNO injection in Th-Cre<sup>LC-DG::</sup>HM3Dq mice 30 minutes prior to task. (E) Th-Cre<sup>LC-DG::</sup>HM3Dq mice injected with saline (n = 8) prior to CFD task are able to discriminate between the two contexts on day 9 of training, while Th-Cre<sup>LC-DG::</sup>HM3Dq mice injected with CNO (n = 9) prior to CFD task are not. (F) Average response amplitude of neurons responding selectively to context A or context B in both wild-type controls and Th-Cre<sup>LC-DG::</sup>HM3Dq mice, at the beginning and end of training (Day 1: Group:  $F_{(1,15)} = 0.390$ ,  $p = 0.541$ ; Context:  $F_{(1,15)} = 0.21.34$ ,  $p = 0.0003$ ; Group  $\times$  Context:  $F_{(1,15)} = 0.553$ ,  $p = 0.469$ ; Day 5: Group:  $F_{(1,15)} = 1.44$ ,  $p = 0.249$ ; Context:  $F_{(1,15)} = 4.47$ ,  $p = 0.052$ ; Group  $\times$  Context:  $F_{(1,15)} = 0.0181$ ,  $p = 0.895$ ; Day 9: Group:  $F_{(1,15)} = 12.49$ ,  $p = 0.003$ ; Context:  $F_{(1,15)} = 25.57$ ,  $p = 0.0001$ ; Group  $\times$  Context:  $F_{(1,15)} = 4.68$ ,  $p = 0.0471$ ). (G) Averaged cell activity traces for cells imaged from Th-Cre<sup>LC-DG::</sup>HM3Dq mice during day 1 of CFD task for neurons responding selectively to context A or context B. (H) Representative neurons responding selectively to context A (unsafe, top), context B (safe, bottom), or responding nonselectively (middle). For each neuron the binarized calcium event trace is plotted below, and the raw calcium trace is plotted above (Context Selectivity:  $F_{(3,1126)} = 73.6$ ,  $p < 0.0001$ ; Group:  $F_{(1,1126)} = 0.513$ ,  $p = 0.474$ ; Group  $\times$  Selectivity:  $F_{(3,1126)} = 0.452$ ,  $p = 0.716$ ). (I) Reconstruction of approximate locations of GRIN lens implants in both wild-type controls and Th-Cre<sup>LC-DG::</sup>HM3Dq mice Scale bar = 300  $\mu\text{m}$ . All data are mean  $\pm$  SEM. \* $p < 0.05$ , \*\*\* $p < 0.005$ .

**Fig. S4. In situ hybridization and control experiment proving specific effect of Opto- $\beta_2$  in CFD and quantification of Opto- $\beta_2$  transfection. Related to Figure 4.**

(A) *In-situ* hybridization depicting coronal images of colocalization of the following: Left column: DAPI (blue), *Adrb2* (white), *Vgat* (red), *Vglut2* (green) within the dentate gyrus of wild-type mice; Right column: DAPI (blue), *Adrb2* (white), *Vgat* (red), *Vglut3* (green) within the dentate gyrus of wild-type mice. (B) Quantification of colocalization percentage of *Vgat*, *Vglut2*, and *Vglut3* with *Adrb2* showed high colocalization of *Adrb2* with *Vgat*, and *Vglut3*, but not *Vglut2*. (C) Schematic of experimental approach depicts infection of DG interneurons using vGAT-Cre mouse line with channelrhodopsin (vGAT-Cre<sup>DG</sup>::ChR2). (D) Contextual fear discrimination (CFD) task with optogenetic activation of the DG interneurons. Animals received a shock in context A (red), but not in context B, for nine days (left). Pattern of laser stimulation (both contexts) and electrical foot shock (only in context A) during a CFD session (right). (E) Mice expressing channelrhodopsin (vGAT-Cre<sup>DG</sup>::ChR2, n = 9) were able to discriminate between the two contexts in a similar fashion to wild-type controls (n = 8; Day 1: Group:  $F_{(1,15)} = 0.467$ ,  $p = 0.505$ ; Context:  $F_{(1,15)} = 0.0248$ ,  $p = 0.877$ ; Group  $\times$  Context:  $F_{(1,15)} = 3.72e-5$ ,  $p = 0.995$ ; Day 5: Group:  $F_{(1,15)} = 0.0017$ ,  $p = 0.968$ ; Context:  $F_{(1,15)} = 5.77$ ,  $p = 0.0297$ ; Group  $\times$  Context:  $F_{(1,15)} = 1.648$ ,  $p = 0.219$ ; Day 9: Group:  $F_{(1,15)} = 0.438$ ,  $p = 0.518$ ; Context:  $F_{(1,15)} = 18.2$ ,  $p = 0.0007$ ; Group  $\times$  Context:  $F_{(1,15)} = 0.117$ ,  $p = 0.737$ ). Both groups received optogenetic light during trial, shaded bar denotes successful stimulation of opsin. (F) Representative image depicting expression of Opto- $\beta_2$  in DG hilus and GCL in vGlut1-Cre mice and vGAT-Cre mice. Scale bar = 100  $\mu$ m. (G) Quantification of overlap between DAPI and Opto- $\beta_2$  shows higher infection of GCL in vGlut1-Cre mice, and higher infection of hilus in vGAT-Cre mice. Representative from 17 mice in two cohorts. All data are mean  $\pm$  SEM. \* $p < 0.05$ , \*\*\* $p < 0.005$ .

**Table S1. Quantification and Statistical Analysis. Related to Figures 1, 2, 3, and 4.**

**Table S2. List of Neurons Recorded From During *In Vivo* Calcium Imaging. Related to Figures 2 and 3.**

# SUPPLEMENTAL FIGURE 1

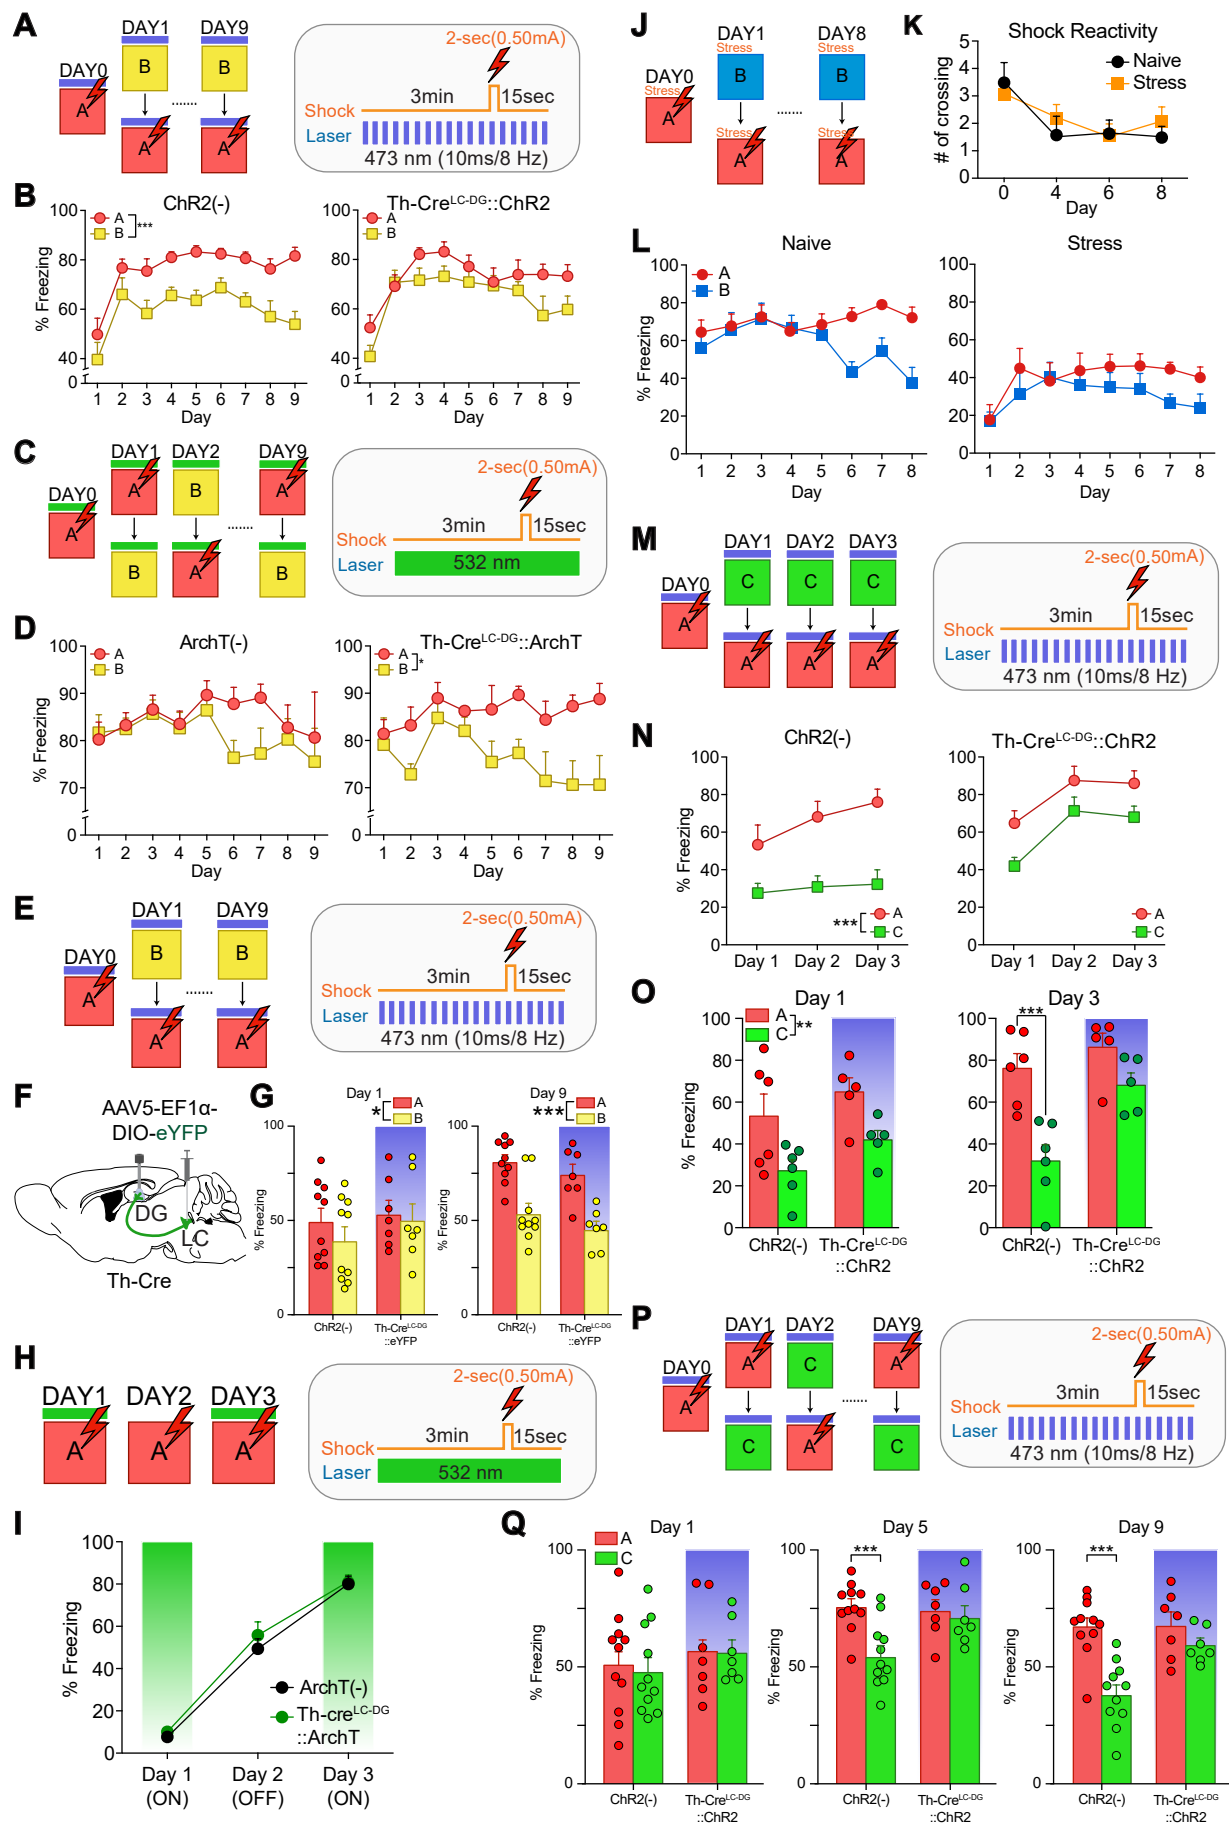



# SUPPLEMENTAL FIGURE 2

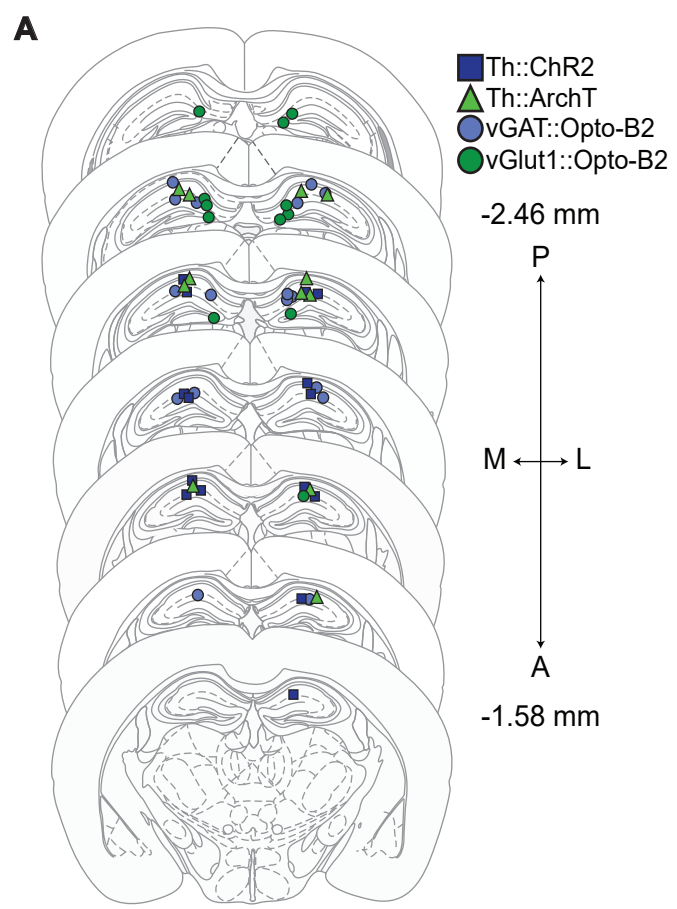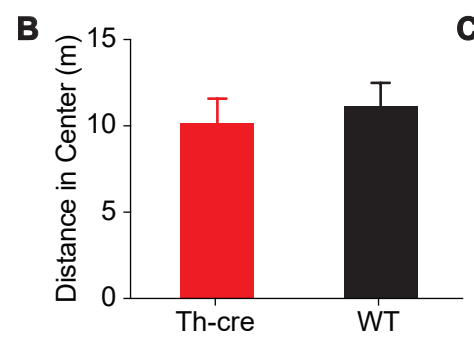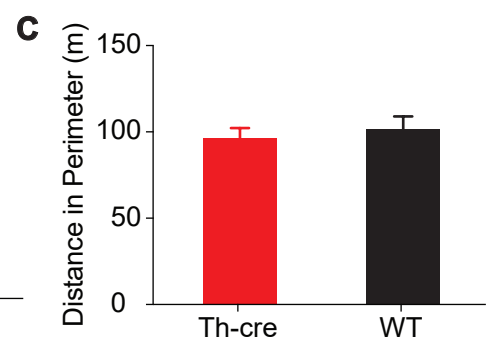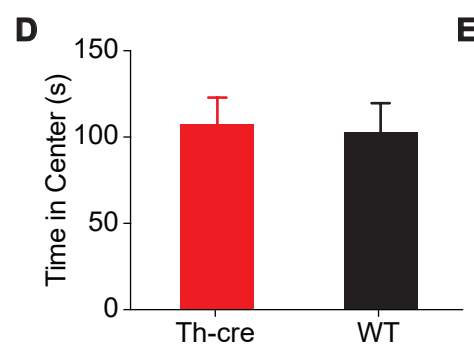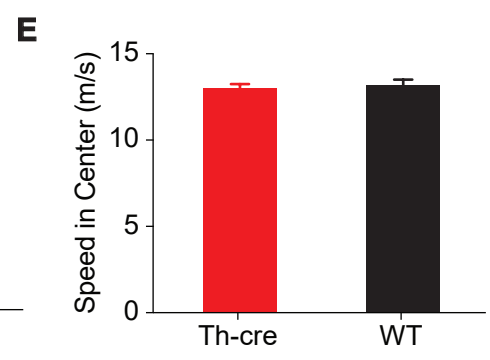

# SUPPLEMENTAL FIGURE 3

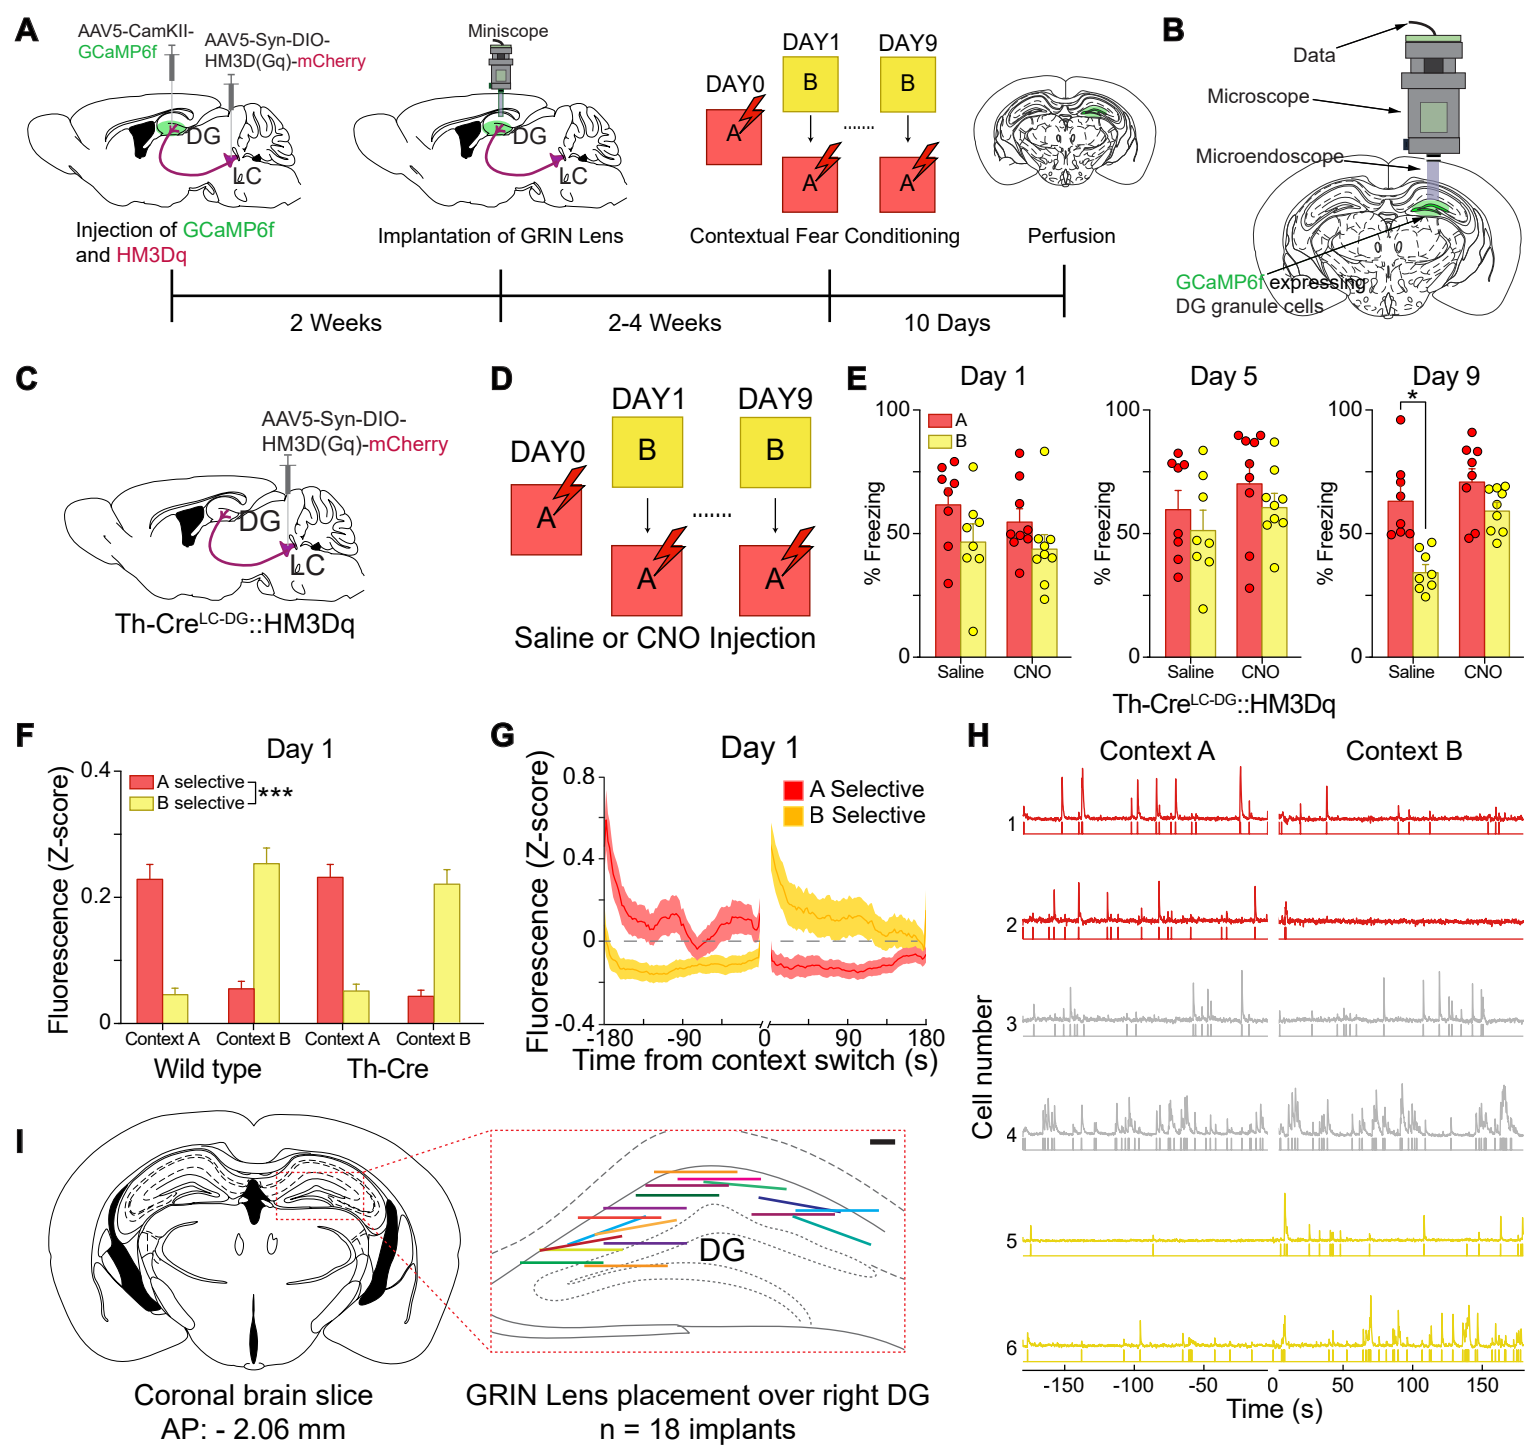

# SUPPLEMENTAL FIGURE 4

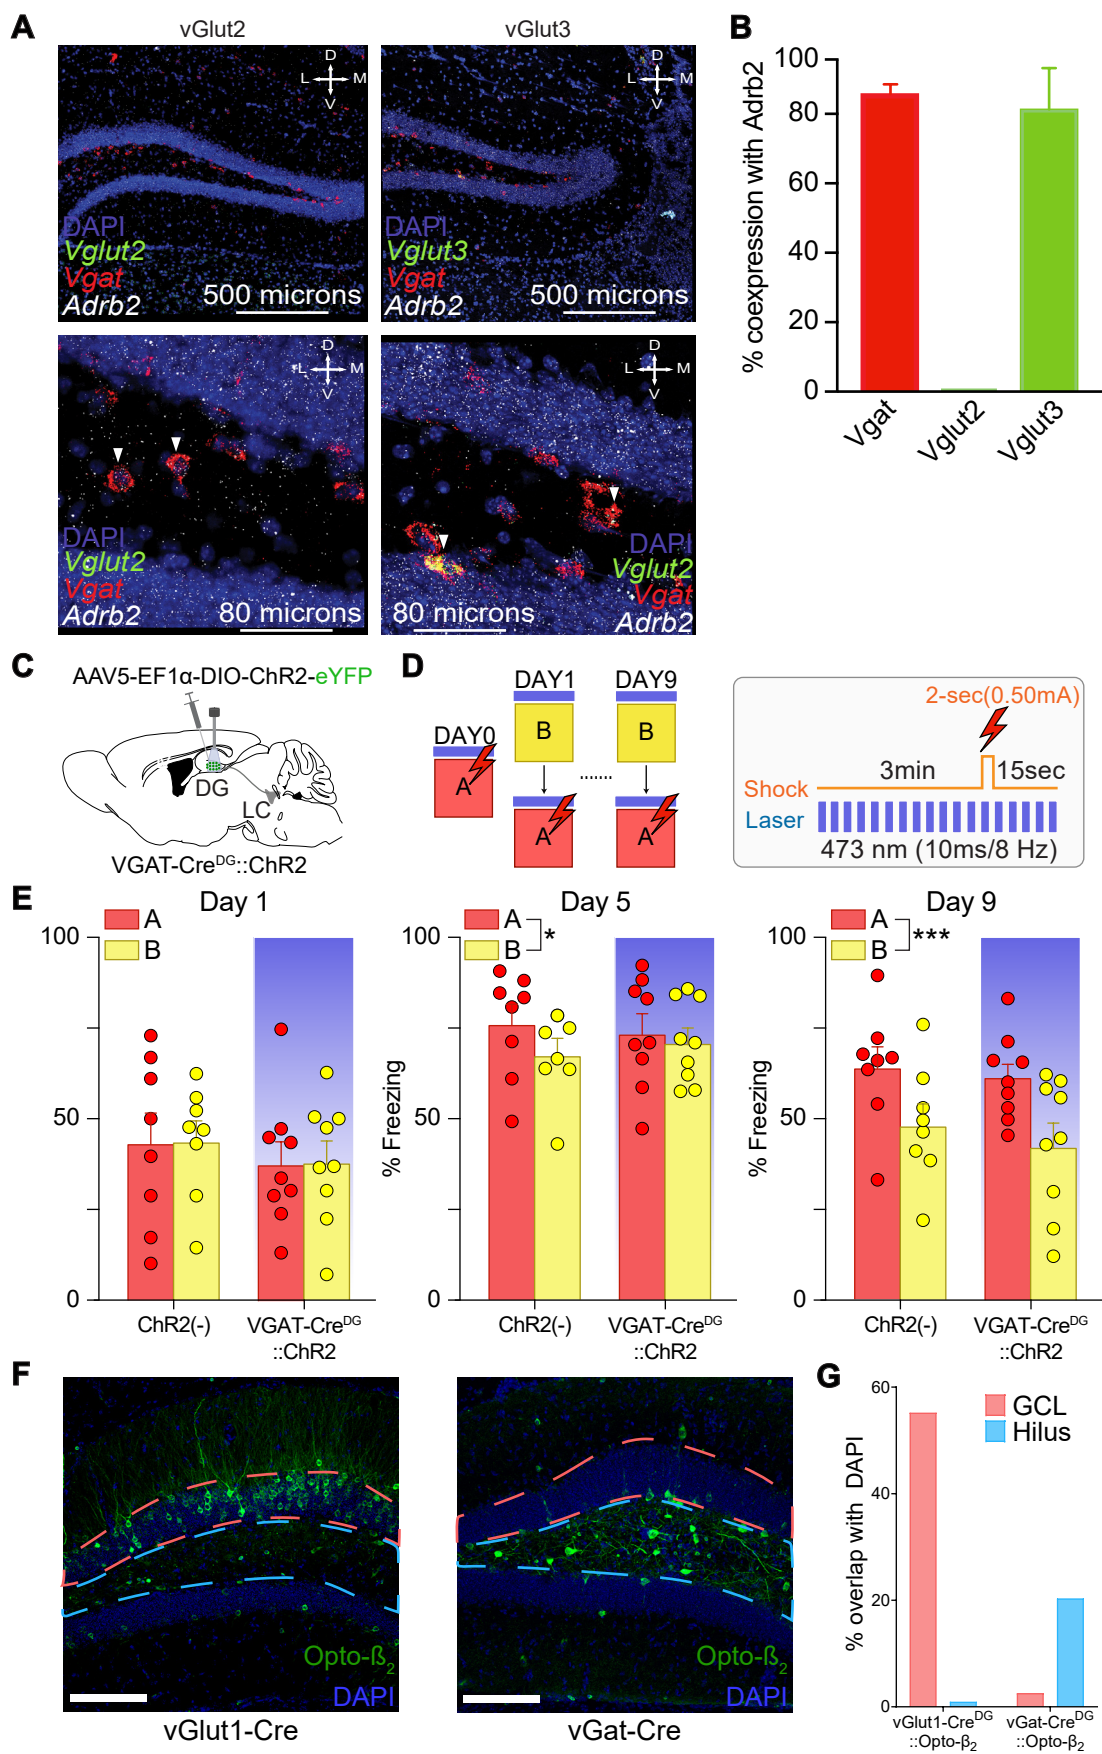

TABLE S1

| Figure | Experimental Variables                           | Statistical Test        | Results                                                                                                                                                                      | Results (post-hoc)                                                                                                                                                    |
|--------|--------------------------------------------------|-------------------------|------------------------------------------------------------------------------------------------------------------------------------------------------------------------------|-----------------------------------------------------------------------------------------------------------------------------------------------------------------------|
| 1      | E<br>Optogenetic Stimulation (ChR2)              | REML                    | Day 1: Group: $F_{(1,18)} = 0.055$ , $p = 0.818$ ; Context: $F_{(1,18)} = 16.885$ , $p < 0.001$ ; Days x Context: $F_{(1,18)} = 0.076$ , $p = 0.796$                         | N/A                                                                                                                                                                   |
|        |                                                  |                         | Day 5: Group: $F_{(1,18)} = 0.012$ , $p = 0.913$ ; Context: $F_{(1,18)} = 30.608$ , $p < 0.001$ ; Days x Context: $F_{(1,18)} = 8.034$ , $p = 0.011$                         | ChR2(-), A vs B, $p < 0.001$ ; Context A, ChR2(-) vs. Th-Cre <sup>Cre</sup> ; ChR2, $p = 0.709$                                                                       |
| 1      | H<br>Optogenetic Stimulation (ArchT)             | REML                    | Day 1: Group: $F_{(1,18)} = 0.040$ , $p = 0.843$ ; Context: $F_{(1,18)} = 36.016$ , $p < 0.001$ ; Group x Context: $F_{(1,18)} = 4.463$ , $p = 0.049$                        | ChR2(-), A vs B, $p < 0.001$ ; Context A, ChR2(-) vs. Th-Cre <sup>Cre</sup> ; ChR2, $p = 0.608$                                                                       |
|        |                                                  |                         | Day 5: Group: $F_{(1,18)} = 2.464$ , $p = 0.141$ ; Context: $F_{(1,18)} = 4.804$ , $p = 0.047$ ; Group x Context: $F_{(1,18)} = 1.435$ , $p = 0.252$                         | N/A                                                                                                                                                                   |
| 2      | L<br>Context Selectivity                         | Chi-squared             | Context A: Chi-square = 0.165, Bonferroni adj. p-value ( $p < 0.008$ ) = 0.682                                                                                               | N/A                                                                                                                                                                   |
|        |                                                  |                         | Context B: Chi-square = 27.3, Bonferroni adj. p-value ( $p < 0.008$ ) < 0.001                                                                                                | N/A                                                                                                                                                                   |
| 2      | M<br>Cell Response-Freezing Response Correlation | Pearson correlation     | Day 1: $r = -0.132$ , $r^2 = 0.0173$ , $p = 0.737$                                                                                                                           | N/A                                                                                                                                                                   |
|        |                                                  |                         | Day 9: $r = 0.749$ , $r^2 = 0.561$ , $p = 0.002$                                                                                                                             | N/A                                                                                                                                                                   |
| 2      | O<br>Context Selectivity                         | Chi-squared             | Context A: Chi-square = 0, Bonferroni adj. p-value ( $p < 0.008$ ) = 1                                                                                                       | N/A                                                                                                                                                                   |
|        |                                                  |                         | Context B: Chi-square = 13.9, Bonferroni adj. p-value ( $p < 0.008$ ) < 0.001                                                                                                | N/A                                                                                                                                                                   |
| 3      | D<br>Treatment (CNO)                             | REML                    | Day 1: Group: $F_{(1,18)} = 2.15$ , $p = 0.162$ ; Context: $F_{(1,18)} = 0.0566$ , $p = 0.815$ ; Group x Context: $F_{(1,18)} = 5.20$ , $p = 0.0366$                         | HM3Dq(-), A vs B, $p = 0.308$ ; Th-Cre <sup>Cre</sup> ; HM3Dq, A vs B, $p = 0.179$                                                                                    |
|        |                                                  |                         | Day 5: Group: $F_{(1,18)} = 0.207$ , $p = 0.655$ ; Context: $F_{(1,18)} = 5.35$ , $p = 0.0389$ ; Group x Context: $F_{(1,18)} = 0.0392$ , $p = 0.846$                        | N/A                                                                                                                                                                   |
| 3      | H<br>Context Selectivity                         | Chi-squared             | Context A: Chi-square = 2.35, Bonferroni adj. p-value ( $p < 0.008$ ) = 0.125                                                                                                | N/A                                                                                                                                                                   |
|        |                                                  |                         | Context B: Chi-square = 6.16, Bonferroni adj. p-value ( $p < 0.008$ ) = 0.0131                                                                                               | N/A                                                                                                                                                                   |
| 3      | I<br>Cell Response-Freezing Response Correlation | Pearson correlation     | Day 1: $r = 0.375$ , $r^2 = 0.141$ , $p = 0.32$                                                                                                                              | N/A                                                                                                                                                                   |
|        |                                                  |                         | Day 9: $r = -0.109$ , $r^2 = 0.0001$ , $p = 0.98$                                                                                                                            | N/A                                                                                                                                                                   |
| 3      | L<br>Context Selectivity                         | Chi-squared             | Context A: Chi-square = 8.82, Bonferroni adj. p-value ( $p < 0.008$ ) = 0.003                                                                                                | N/A                                                                                                                                                                   |
|        |                                                  |                         | Context B: Chi-square = 0.58, Bonferroni adj. p-value ( $p < 0.008$ ) = 0.066                                                                                                | N/A                                                                                                                                                                   |
| 3      | M<br>Context Selectivity                         | Kolmogorov-Smirnov test | HM3Dq(-): K-stat = 0.171, $p < 0.001$                                                                                                                                        | N/A                                                                                                                                                                   |
|        |                                                  |                         | Th-Cre <sup>Cre</sup> ; HM3Dq: K-stat = 0.0724, $p = 0.0533$                                                                                                                 | N/A                                                                                                                                                                   |
| 4      | D<br>Treatment (Propranolol)                     | REML                    | Day 1: Group: $F_{(1,12)} = 0.665$ , $p = 0.431$ ; Context: $F_{(1,12)} = 0.361$ , $p = 0.559$ ; Group x Context: $F_{(1,12)} = 3.29$ , $p = 0.0947$                         | N/A                                                                                                                                                                   |
|        |                                                  |                         | Day 5: Group: $F_{(1,12)} = 1.31$ , $p = 0.274$ ; Context: $F_{(1,12)} = 1.15$ , $p = 0.305$ ; Group x Context: $F_{(1,12)} = 1.39$ , $p = 0.261$                            | N/A                                                                                                                                                                   |
| 4      | L<br>Optogenetic Stimulation (Opto-β2)           | REML                    | Day 1: Group: $F_{(1,12)} = 0.0468$ , $p = 0.832$ ; Context: $F_{(1,12)} = 1.49$ , $p = 0.246$ ; Group x Context: $F_{(1,12)} = 0.398$ , $p = 0.540$                         | N/A                                                                                                                                                                   |
|        |                                                  |                         | Day 5: Group: $F_{(1,12)} = 0.0913$ , $p = 0.768$ ; Context: $F_{(1,12)} = 5.20$ , $p = 0.0417$ ; Group x Context: $F_{(1,12)} = 0.0151$ , $p = 0.904$                       | N/A                                                                                                                                                                   |
| 4      | M<br>Action Potentials                           | REML                    | Depolarization Step: $F_{(15,288)} = 9.303$ , $p < 0.0001$ ; Drug: $F_{(2,288)} = 59.84$ , $p < 0.0001$ ; Depolarization Step x Drug: $F_{(30,288)} = 2.207$ , $p = 0.0005$  | Veh vs Prop: $p < 0.0001$ ; Veh vs Iso: $p < 0.0001$ ; Prop vs Iso: $p < 0.0001$                                                                                      |
|        |                                                  |                         | Statistics derived from Two-way ANOVA of the data specified in Figure 4. Veh vs Prop: $p = 0.1411$ ; Veh vs Iso: $p = 0.0385$ ; Prop vs Iso: $p = 0.0005$                    | N/A                                                                                                                                                                   |
| 4      | R<br>Optogenetic Stimulation (Opto-β2)           | REML                    | Day 1: Group: $F_{(1,17)} = 0.862$ , $p = 0.366$ ; Context: $F_{(1,17)} = 0.352$ , $p = 0.561$ ; Group x Context: $F_{(1,17)} = 7.157$ , $p = 0.016$                         | Opto-β2(-), A vs B, $p = 0.275$ ; vGAT1-Cre <sup>Cre</sup> ; Opto-β2, A vs B, $p = 0.074$ ; Context A, Opto-β2(-) vs. vGAT1-Cre <sup>Cre</sup> ; Opto-β2, $p = 0.270$ |
|        |                                                  |                         | Day 5: Group: $F_{(1,17)} = 0.196$ , $p = 0.664$ ; Context: $F_{(1,17)} = 2.175$ , $p = 0.159$ ; Group x Context: $F_{(1,17)} = 3.281$ , $p = 0.088$                         | Context A, Opto-β2(-) vs. vGAT1-Cre <sup>Cre</sup> ; Opto-β2, $p = 0.596$                                                                                             |
| 5      | U<br>Stress/Naive                                | REML                    | Day 3: Group: $F_{(1,20)} = 6.137$ , $p = 0.033$                                                                                                                             | N/A                                                                                                                                                                   |
|        |                                                  |                         | Day 6: Group: $F_{(1,20)} = 4.044$ , $p = 0.073$ ; Context: $F_{(1,20)} = 21.429$ , $p < 0.001$ ; Days x Context: $F_{(1,20)} = 3.824$ , $p = 0.071$                         | N/A                                                                                                                                                                   |
| 5      | B<br>Optogenetic Stimulation (ChR2)              | REML                    | ChR2(-): Context: $F_{(1,18)} = 2.685$ , $p = 0.119$ ; Days: $F_{(1,18)} = 14.568$ , $p < 0.001$ ; Days x Context: $F_{(8,144)} = 1.386$ , $p = 0.206$                       | N/A                                                                                                                                                                   |
|        |                                                  |                         | Th-Cre <sup>Cre</sup> ; ChR2: Context: $F_{(1,18)} = 19.430$ , $p < 0.001$ ; Days: $F_{(1,18)} = 10.940$ , $p < 0.001$ ; Days x Context: $F_{(8,144)} = 0.652$ , $p = 0.525$ | N/A                                                                                                                                                                   |
| 5      | D<br>Optogenetic Stimulation (ArchT)             | REML                    | ArchT(-): Context: $F_{(1,18)} = 0.581$ , $p = 0.423$ ; Days: $F_{(1,18)} = 1.865$ , $p < 0.073$ ; Days x Context: $F_{(8,144)} = 1.251$ , $p = 0.276$                       | N/A                                                                                                                                                                   |
|        |                                                  |                         | Th-Cre <sup>Cre</sup> ; ArchT: Context: $F_{(1,18)} = 5.743$ , $p = 0.034$ ; Days: $F_{(1,18)} = 2.470$ , $p = 0.018$ ; Days x Context: $F_{(8,144)} = 2.085$ , $p = 0.045$  | N/A                                                                                                                                                                   |
| 5      | G<br>Transgenic Background (Th-Cre)              | REML                    | Day 1: Group: $F_{(1,15)} = 0.533$ , $p = 0.477$ ; Context: $F_{(1,15)} = 5.75$ , $p = 0.0299$ ; Group x Context: $F_{(1,15)} = 1.34$ , $p = 0.266$                          | N/A                                                                                                                                                                   |
|        |                                                  |                         | Day 9: Group: $F_{(1,15)} = 2.26$ , $p = 0.154$ ; Context: $F_{(1,15)} = 44.94$ , $p < 0.0001$ ; Group x Context: $F_{(1,15)} = 0.0292$ , $p = 0.867$                        | N/A                                                                                                                                                                   |
| 5      | I<br>Optogenetic Stimulation (ArchT)             | Paired t-test           | $t_{(15)} = 2.075$ ; $p = 0.1737$                                                                                                                                            | N/A                                                                                                                                                                   |
|        |                                                  |                         | Group x Days: $F_{(3,15)} = 1.264$ , $p = 0.317$                                                                                                                             | N/A                                                                                                                                                                   |
| S1     | L<br>Stress/Naive                                | REML                    | Naive: Context: $F_{(7,84)} = 2.790$ , $p = 0.134$ ; Days: $F_{(7,84)} = 2.712$ , $p = 0.014$ ; Days x Context: $F_{(7,84)} = 4.449$ , $p < 0.001$                           | N/A                                                                                                                                                                   |
|        |                                                  |                         | Stress: Context: $F_{(1,12)} = 1.823$ , $p = 0.201$ ; Days: $F_{(7,84)} = 3.169$ , $p = 0.005$ ; Days x Context: $F_{(7,84)} = 0.640$ , $p = 0.721$                          | N/A                                                                                                                                                                   |
| S1     | N<br>Optogenetic Stimulation (ChR2)              | REML                    | ChR2(-): Context: $F_{(1,15)} = 68.1$ , $p < 0.001$ ; Days: $F_{(2,15)} = 3.071$ , $p < 0.091$ ; Days x Context: $F_{(2,15)} = 2.433$ , $p = 0.137$                          | N/A                                                                                                                                                                   |
|        |                                                  |                         | Th-Cre <sup>Cre</sup> ; ChR2: Context: $F_{(1,15)} = 3.32$ , $p < 0.142$ ; Days: $F_{(2,15)} = 75.08$ , $p < 0.001$ ; Days x Context: $F_{(2,15)} = 0.905$ , $p = 0.442$     | N/A                                                                                                                                                                   |
| S1     | O<br>Optogenetic Stimulation (ChR2)              | REML                    | Day 1: Group: $F_{(1,9)} = 2.661$ , $p = 0.137$ ; Context: $F_{(1,9)} = 12.79$ , $p = 0.006$ ; Group x Context: $F_{(1,9)} = 0.055$ , $p = 0.82$                             | N/A                                                                                                                                                                   |
|        |                                                  |                         | Day 3: Group: $F_{(1,9)} = 6.645$ , $p = 0.0298$ ; Context: $F_{(1,9)} = 48.84$ , $p < 0.0001$ ; Group x Context: $F_{(1,9)} = 8.509$ , $p = 0.017$                          | ChR2(-), A vs C, $p < 0.001$                                                                                                                                          |
| S1     | Q<br>Optogenetic Stimulation (ChR2)              | REML                    | Day 1: Group: $F_{(1,15)} = 0.611$ , $p = 0.446$ ; Context: $F_{(1,15)} = 0.363$ , $p = 0.555$ ; Group x Context: $F_{(1,15)} = 0.114$ , $p = 0.740$                         | N/A                                                                                                                                                                   |
|        |                                                  |                         | Day 5: Group: $F_{(1,15)} = 2.51$ , $p = 0.132$ ; Context: $F_{(1,15)} = 9.80$ , $p = 0.0065$ ; Group x Context: $F_{(1,15)} = 5.62$ , $p = 0.0307$                          | ChR2(-), A vs C, $p < 0.001$                                                                                                                                          |
| S2     | C<br>Th-Cre/WT                                   | Paired t-test           | $t_{(15)} = -0.5002$ ; $p = 0.6230$                                                                                                                                          | N/A                                                                                                                                                                   |
|        |                                                  |                         | $t_{(15)} = -0.6720$ ; $p = 0.5101$                                                                                                                                          | N/A                                                                                                                                                                   |
| S2     | D<br>Th-Cre/WT                                   | Paired t-test           | $t_{(15)} = 0.2176$ ; $p = 0.8301$                                                                                                                                           | N/A                                                                                                                                                                   |
|        |                                                  |                         | $t_{(15)} = -1.3705$ ; $p = 0.1874$                                                                                                                                          | N/A                                                                                                                                                                   |
| S3     | F<br>Transgenic Background (Th-Cre)              | REML                    | Day 1: Group: $F_{(1,15)} = 0.390$ , $p = 0.541$ ; Context: $F_{(1,15)} = 0.2134$ , $p = 0.0003$ ; Group x Context: $F_{(1,15)} = 0.553$ , $p = 0.469$                       | N/A                                                                                                                                                                   |
|        |                                                  |                         | Day 5: Group: $F_{(1,15)} = 1.44$ , $p = 0.249$ ; Context: $F_{(1,15)} = 4.47$ , $p = 0.052$ ; Group x Context: $F_{(1,15)} = 0.0181$ , $p = 0.895$                          | N/A                                                                                                                                                                   |
| S3     | H<br>Cell Selective Activity                     | REML                    | Day 9: Group: $F_{(1,15)} = 12.49$ , $p = 0.003$ ; Context: $F_{(1,15)} = 25.57$ , $p = 0.0001$ ; Group x Context: $F_{(1,15)} = 4.68$ , $p = 0.0471$                        | Saline Treatment, A vs B, $p < 0.001$                                                                                                                                 |
|        |                                                  |                         | Context Selectivity: $F_{(2,112)} = 73.6$ , $p < 0.0001$ ; Group: $F_{(1,112)} = 0.513$ , $p = 0.474$ ; Group x Selectivity: $F_{(2,112)} = 0.452$ , $p = 0.716$             | N/A                                                                                                                                                                   |
| S4     | E<br>Optogenetic Stimulation (ChR2)              | REML                    | Day 1: Group: $F_{(1,15)} = 0.467$ , $p = 0.505$ ; Context: $F_{(1,15)} = 0.0248$ , $p = 0.877$ ; Group x Context: $F_{(1,15)} = 3.72e-5$ , $p = 0.995$                      | N/A                                                                                                                                                                   |
|        |                                                  |                         | Day 5: Group: $F_{(1,15)} = 0.0017$ , $p = 0.968$ ; Context: $F_{(1,15)} = 5.77$ , $p = 0.0297$ ; Group x Context: $F_{(1,15)} = 1.648$ , $p = 0.219$                        | N/A                                                                                                                                                                   |
| S4     | E<br>Optogenetic Stimulation (ChR2)              | REML                    | Day 9: Group: $F_{(1,15)} = 0.438$ , $p = 0.518$ ; Context: $F_{(1,15)} = 18.2$ , $p = 0.0007$ ; Group x Context: $F_{(1,15)} = 0.117$ , $p = 0.737$                         | N/A                                                                                                                                                                   |

**Table S2**

| Mouse        | Day 1 Total | Day 1 A Selective | Day 1 B Selective | Day 9 Total | Day 9 A Selective | Day 9 B Selective | Matched Cells |
|--------------|-------------|-------------------|-------------------|-------------|-------------------|-------------------|---------------|
| Th-cre 2-1   | 43          | 5                 | 15                | 50          | 7                 | 19                | 9             |
| Th-cre 2-2   | 105         | 50                | 13                | 137         | 37                | 15                | 80            |
| Th-cre 2-3   | 78          | 29                | 17                | 98          | 24                | 35                | 58            |
| Th-cre 348-1 | 32          | 15                | 1                 | 25          | 8                 | 9                 | 5             |
| Th-cre 349-2 | 355         | 90                | 85                | 221         | 59                | 68                | 28            |
| Th-cre 386-2 | 45          | 8                 | 12                | 10          | 0                 | 3                 | 0             |
| Th-cre 387-4 | 31          | 5                 | 12                | 31          | 5                 | 21                | 8             |
| Th-cre 396-1 | 37          | 5                 | 8                 | 38          | 10                | 6                 | 26            |
| Th-cre 396-3 | 63          | 1                 | 14                | 67          | 5                 | 14                | 21            |
| WT 122-1     | 16          | 6                 | 3                 | 32          | 20                | 6                 | 9             |
| WT 122-2     | 36          | 10                | 5                 | 43          | 6                 | 9                 | 19            |
| WT 122-3     | 43          | 14                | 12                | 60          | 6                 | 30                | 18            |
| WT 124-2     | 11          | 4                 | 2                 | 9           | 4                 | 3                 | 0             |
| WT 1055-1    | 46          | 6                 | 7                 | 49          | 12                | 6                 | 24            |
| WT 1055-2    | 165         | 4                 | 4                 | 142         | 3                 | 27                | 55            |
| WT 1055-3    | 122         | 10                | 29                | 111         | 12                | 23                | 64            |
| WT 1055-4    | 93          | 13                | 34                | 107         | 21                | 47                | 51            |
| WT 14-0      | 39          | 19                | 0                 | 45          | 1                 | 27                | 17            |
